# Supplementary material
Source: HighWire-hosted journal article supplement (https://tobaccocontrol.bmj.com/content/tobaccocontrol-2016-053373)
Supplement: inline-supplementary-material-1 [file inline-supplementary-material-1.pdf]

## **Supplementary Tables**

Supplementary Table 1: Demographic Factors Associated with the Top 3 Flavor Types Used with Smokeless Tobacco in the Past 30 Days among Past 30-day Users of Flavored Smokeless Tobacco, by Specific Flavor (n=906)

Supplementary Table 2: Demographic Factors Associated with the Top 3 Flavor Types Used with Hookah in the Past 30 Days among Past 30-day Users of Flavored Hookah, by Specific Flavor (n=1,118)

Supplementary Table 1: Demographic Factors Associated with the Top 3 Flavor Types Used with Smokeless Tobacco in the Past 30 Days among Past 30-day Users of Flavored Smokeless Tobacco, by Specific Flavor (n=906)

|                                     | Menthol/Mint Flavor** |                  |            | Clove/Spice/Herb Flavor** |                  |            | Fruit Flavor** |                  |            |
|-------------------------------------|-----------------------|------------------|------------|---------------------------|------------------|------------|----------------|------------------|------------|
|                                     | n                     | % (95% CI)       | <i>p</i> † | n                         | % (95% CI)       | <i>p</i> † | n              | % (95% CI)       | <i>p</i> † |
| <b>Overall</b>                      | 692                   | 76.9 (73.1-80.3) |            | 114                       | 12.3 (9.9-15.3)  |            | 106            | 10.8 (8.5-13.6)  |            |
| <b>Gender</b>                       |                       |                  | 0.562      |                           |                  | ¶          |                |                  | ¶          |
| Male                                | 643                   | 76.6 (72.6-80.1) |            | 109                       | 12.8 (10.2-15.9) |            | 94             | 10.9 (8.5-13.8)  |            |
| Female                              | 41                    | 80.7 (64.7-90.4) |            | 5                         | †                |            | 12             | †                |            |
| <b>Age group (years)</b>            |                       |                  | 0.156      |                           |                  | ¶          |                |                  | ¶          |
| 18-24                               | 193                   | 80.6 (72.4-86.7) |            | 16                        | 7.7 (4.3-13.4)   |            | 32             | 13.9 (9.0-20.8)  |            |
| 25-29                               | 96                    | 82.0 (72.8-88.6) |            | 16                        | 14.4 (8.3-23.9)  |            | 18             | 12.9 (7.6-21.2)  |            |
| 30-44                               | 195                   | 75.2 (68.0-81.3) |            | 35                        | 13.7 (9.1-20.0)  |            | 26             | 7.7 (4.8-12.2)   |            |
| 45-64                               | 161                   | 73.4 (65.8-79.8) |            | 34                        | 14.7 (10.1-20.9) |            | 22             | 9.4 (5.5-15.6)   |            |
| 65+                                 | 44                    | 59.5 (44.2-73.2) |            | 12                        | †                |            | 8              | †                |            |
| <b>Race/Ethnicity</b>               |                       |                  | 0.671      |                           |                  | ¶          |                |                  | ¶          |
| White, Non-Hispanic                 | 548                   | 77.1 (73.1-80.7) |            | 97                        | 12.3 (9.7-15.5)  |            | 84             | 11.0 (8.5-14.2)  |            |
| Black, Non-Hispanic                 | 24                    | 65.1 (39.9-84.0) |            | 5                         | †                |            | 3              | †                |            |
| Hispanic                            | 61                    | 81.7 (67.8-90.5) |            | 7                         | †                |            | 11             | †                |            |
| Other, Non-Hispanic*                | 44                    | 75.0 (57.3-87.0) |            | 5                         | †                |            | 7              | †                |            |
| <b>Annual Household Income (\$)</b> |                       |                  | 0.400      |                           |                  | ¶          |                |                  | ¶          |
| < 20,000                            | 45                    | 69.5 (53.9-81.7) |            | 5                         | †                |            | 19             | 22.8 (12.9-37.1) |            |
| 20,000–49,999                       | 191                   | 81.9 (75.0-87.2) |            | 28                        | 11.6 (7.3-17.7)  |            | 25             | 9.7 (6.0-15.2)   |            |
| 50,000–99,999                       | 166                   | 75.3 (67.7-81.6) |            | 27                        | 11.0 (6.9-17.0)  |            | 30             | 13.0 (8.3-19.7)  |            |
| ≥ 100,000                           | 135                   | 78.4 (68.9-85.6) |            | 21                        | 13.0 (7.9-20.8)  |            | 15             | †                |            |
| Unspecified                         | 155                   | 74.3 (65.3-81.7) |            | 33                        | 14.5 (9.4-21.6)  |            | 17             | 6.3 (3.5-11.3)   |            |
| <b>Education</b>                    |                       |                  | 0.687      |                           |                  | ¶          |                |                  | ¶          |
| Less than High School               | 82                    | 77.1 (65.3-85.7) |            | 14                        | †                |            | 12             | †                |            |
| High School diploma/GED             | 219                   | 74.1 (67.4-79.8) |            | 36                        | 12.0 (8.4-16.9)  |            | 38             | 13.2 (8.9-18.9)  |            |
| Some College                        | 233                   | 78.8 (72.2-84.1) |            | 42                        | 13.7 (9.4-19.6)  |            | 32             | 8.7 (5.6-13.1)   |            |
| Bachelor's degree or higher         | 149                   | 79.2 (71.5-85.2) |            | 21                        | 10.9 (6.8-17.1)  |            | 24             | 11.1 (6.7-17.9)  |            |
| <b>U.S. Census Region</b>           |                       |                  | 0.006      |                           |                  | 0.189      |                |                  | ¶          |
| Northeast                           | 90                    | 78.4 (68.6-85.8) |            | 14                        | 10.9 (6.0-19.0)  |            | 23             | 17.8 (10.6-28.4) |            |
| Midwest                             | 178                   | 80.2 (72.5-86.1) |            | 24                        | 10.0 (6.2-15.6)  |            | 28             | 10.8 (6.8-16.7)  |            |
| South                               | 249                   | 71.1 (64.7-76.7) |            | 53                        | 15.3 (11.2-20.7) |            | 36             | 10.3 (6.9-14.9)  |            |
| West                                | 175                   | 86.1 (79.1-91.1) |            | 23                        | 9.0 (5.1-15.3)   |            | 19             | †                |            |
| <b>Sexual Orientation</b>           |                       |                  | ¶          |                           |                  | ¶          |                |                  | ¶          |
| Heterosexual/Straight               | 585                   | 76.4 (72.3-80.1) |            | 96                        | 12.2 (9.6-15.3)  |            | 92             | 11.4 (8.9-14.5)  |            |
| Lesbian, gay or bisexual            | 24                    | †                |            | 3                         | †                |            | 3              | †                |            |
| Unspecified                         | 83                    | 75.8 (63.3-85.0) |            | 15                        | †                |            | 11             | †                |            |
| <b>Cigarette Smoking Status</b>     |                       |                  | 0.467      |                           |                  | ¶          |                |                  | ¶          |
| Current Smoker                      | 246                   | 78.0 (71.7-83.2) |            | 39                        | 10.7 (7.2-15.6)  |            | 43             | 12.5 (8.6-17.9)  |            |
| Recent Former Smoker                | 47                    | 84.5 (68.9-93.1) |            | 3                         | †                |            | 10             | †                |            |
| Long-Term Former Smoker             | 158                   | 73.1 (65.4-79.5) |            | 37                        | 15.5 (10.7-22.0) |            | 23             | 9.4 (5.6-15.3)   |            |
| Never Smoker                        | 233                   | 76.7 (69.2-82.8) |            | 34                        | 12.8 (8.5-18.8)  |            | 29             | 9.0 (5.7-13.9)   |            |

GED=General Education Development Certificate; n=unweighted number of specific flavor users

\* Other, Non-Hispanic includes Asian, Non-Hispanic; Native Hawaiian or Other Pacific Islander, Non-Hispanic; American Indian or Alaska Native, Non-Hispanic; Multiracial, Non-Hispanic and Other race, Non-Hispanic

† the relative SE was  $\geq 30\%$  or denominator less than 50

‡ P-value based on Satterthwaite-adjusted Wald chi-square

¶ P-value not presented due to unstable estimates for one or more demographic groups.

\*\*Flavored smokeless tobacco users were allowed to report the use of more than one flavor thus, proportions of specific flavor used may add to more than 100%.

Supplementary Table 2: Demographic Factors Associated with the Top 3 Flavor Types Used with Hookah in the Past 30 Days among Past 30-day Users of Flavored Hookah, by Specific Flavor (n=1,118)

|                                     | Fruit Flavor** |                  |       | Menthol/Mint Flavor** |                  |       | Candy, chocolate or other sweet Flavor** |                  |       |
|-------------------------------------|----------------|------------------|-------|-----------------------|------------------|-------|------------------------------------------|------------------|-------|
|                                     | n              | % (95% CI)       | p‡    | n                     | % (95% CI)       | p‡    | n                                        | % (95% CI)       | p‡    |
| <b>Overall</b>                      | 852            | 74.0 (70.4-77.4) |       | 214                   | 18.9 (15.9-22.2) |       | 205                                      | 17.4 (14.7-20.6) |       |
| <b>Gender</b>                       |                |                  | 0.457 |                       |                  | 0.862 |                                          |                  | 0.881 |
| Male                                | 486            | 75.4 (70.6-79.7) |       | 124                   | 19.1 (15.2-23.8) |       | 117                                      | 17.2 (13.5-21.5) |       |
| Female                              | 357            | 72.7 (66.8-77.9) |       | 87                    | 18.6 (14.3-23.7) |       | 84                                       | 17.6 (13.6-22.5) |       |
| <b>Age group (years)</b>            |                |                  | ¶     |                       |                  | ¶     |                                          |                  | ¶     |
| 18-24                               | 480            | 73.5 (68.6-77.9) |       | 120                   | 18.0 (14.3-22.5) |       | 121                                      | 17.3 (13.8-21.5) |       |
| 25-29                               | 195            | 73.1 (64.8-80.1) |       | 53                    | 22.6 (16.4-30.2) |       | 45                                       | 21.7 (15.4-29.8) |       |
| 30-44                               | 150            | 78.2 (69.5-84.9) |       | 34                    | 17.8 (11.7-26.0) |       | 31                                       | 12.8 (8.3-19.3)  |       |
| 45-64                               | 25             | †                |       | 6                     | †                |       | 6                                        | †                |       |
| 65+                                 | 1              | †                |       | 0                     | †                |       | 1                                        | †                |       |
| <b>Race/Ethnicity</b>               |                |                  | 0.139 |                       |                  | 0.200 |                                          |                  | 0.382 |
| White, Non-Hispanic                 | 500            | 78.6 (74.2-82.4) |       | 115                   | 17.7 (14.1-21.9) |       | 110                                      | 16.4 (13.0-20.5) |       |
| Black, Non-Hispanic                 | 104            | 72.2 (61.5-80.8) |       | 24                    | 13.5 (8.6-20.4)  |       | 30                                       | 24.6 (16.4-35.2) |       |
| Hispanic                            | 95             | 64.6 (52.8-74.9) |       | 28                    | 24.5 (15.5-36.5) |       | 28                                       | 16.8 (10.4-25.8) |       |
| Other, Non-Hispanic*                | 144            | 73.1 (64.2-80.5) |       | 47                    | 22.7 (15.8-31.4) |       | 33                                       | 15.3 (9.9-22.9)  |       |
| <b>Annual Household Income (\$)</b> |                |                  | 0.560 |                       |                  | ¶     |                                          |                  | 0.726 |
| < 20,000                            | 72             | 78.0 (61.2-88.8) |       | 16                    | †                |       | 20                                       | 20.9 (11.8-34.3) |       |
| 20,000–49,999                       | 249            | 73.6 (66.7-79.6) |       | 74                    | 20.5 (15.4-26.7) |       | 54                                       | 14.6 (10.2-20.5) |       |
| 50,000–99,999                       | 219            | 77.5 (71.2-82.8) |       | 55                    | 18.4 (13.6-24.5) |       | 55                                       | 17.4 (12.9-23.0) |       |
| ≥ 100,000                           | 115            | 67.1 (56.0-76.5) |       | 24                    | 19.5 (11.9-30.3) |       | 26                                       | 19.5 (12.0-30.0) |       |
| Unspecified                         | 197            | 74.0 (66.0-80.6) |       | 45                    | 18.3 (12.3-26.4) |       | 50                                       | 18.8 (13.2-26.1) |       |
| <b>Education</b>                    |                |                  | 0.337 |                       |                  | ¶     |                                          |                  | ¶     |
| Less than High School               | 47             | 73.3 (57.3-84.9) |       | 4                     | †                |       | 10                                       | †                |       |
| High School diploma/GED             | 238            | 70.6 (63.7-76.6) |       | 69                    | 21.9 (16.5-28.5) |       | 71                                       | 20.1 (15.1-26.3) |       |
| Some College                        | 296            | 74.7 (68.7-80.0) |       | 71                    | 17.6 (13.5-22.7) |       | 68                                       | 17.5 (13.1-23.0) |       |
| Bachelor's degree or higher         | 261            | 79.9 (73.4-85.1) |       | 68                    | 21.1 (15.9-27.3) |       | 52                                       | 14.0 (10.0-19.4) |       |
| <b>U.S. Census Region</b>           |                |                  | 0.687 |                       |                  | 0.010 |                                          |                  | 0.682 |
| Northeast                           | 178            | 71.8 (62.8-79.4) |       | 57                    | 31.6 (22.9-41.7) |       | 34                                       | 14.5 (8.9-22.7)  |       |
| Midwest                             | 155            | 75.2 (66.0-82.6) |       | 34                    | 14.6 (9.4-22.0)  |       | 42                                       | 20.5 (14.1-29.0) |       |
| South                               | 264            | 72.4 (66.0-78.1) |       | 65                    | 16.1 (12.1-21.0) |       | 70                                       | 17.5 (13.3-22.7) |       |
| West                                | 255            | 77.1 (70.3-82.7) |       | 58                    | 15.7 (11.7-20.8) |       | 59                                       | 17.5 (12.6-24.0) |       |
| <b>Sexual Orientation</b>           |                |                  | 0.541 |                       |                  | ¶     |                                          |                  | 0.690 |
| Heterosexual/Straight               | 649            | 73.5 (69.2-77.3) |       | 165                   | 18.9 (15.6-22.6) |       | 143                                      | 17.1 (13.9-20.9) |       |
| Lesbian, gay or bisexual            | 94             | 72.0 (59.5-81.9) |       | 31                    | 22.9 (15.2-33.1) |       | 31                                       | 20.8 (13.4-30.8) |       |
| Unspecified                         | 109            | 78.9 (68.7-86.4) |       | 18                    | †                |       | 31                                       | 16.1 (10.2-24.5) |       |
| <b>Cigarette Smoking Status</b>     |                |                  | 0.650 |                       |                  | ¶     |                                          |                  | ¶     |
| Current Smoker                      | 289            | 75.0 (68.6-80.5) |       | 58                    | 13.5 (9.8-18.4)  |       | 77                                       | 16.8 (12.6-22.2) |       |
| Recent Former Smoker                | 47             | 80.9 (67.1-89.7) |       | 16                    | 15.3 (8.4-26.2)  |       | 12                                       | †                |       |
| Long-Term Former Smoker             | 49             | 71.4 (52.4-85.0) |       | 12                    | †                |       | 17                                       | 32.6 (18.5-50.9) |       |
| Never Smoker                        | 458            | 72.6 (67.4-77.2) |       | 127                   | 24.0 (19.5-29.3) |       | 98                                       | 16.4 (12.8-20.8) |       |

GED=General Education Development Certificate; n=unweighted number of specific flavor users

\* Other, Non-Hispanic includes Asian, Non-Hispanic; Native Hawaiian or Other Pacific Islander, Non-Hispanic; American Indian or Alaska Native, Non-Hispanic; Multiracial, Non-Hispanic and Other race, Non-Hispanic

† the relative SE was  $\geq 30\%$  or denominator less than 50

‡ P-value based on Satterthwaite-adjusted Wald chi-square

¶ P-value not presented due to unstable estimates for one or more demographic groups.

\*\*Flavored hookah users were allowed to report the use of more than one flavor thus, proportions of specific flavor used may add to more than 100%.
